# Supplementary material
Source: PubMed Central journal article supplement (PMC8352814)
Supplement: 40273_2021_1050_MOESM1_ESM.pdf [file 40273_2021_1050_MOESM1_ESM.pdf]

|                                                                                |                                              |                           |
|--------------------------------------------------------------------------------|----------------------------------------------|---------------------------|
| E                                                                              | Campo obbligatorio ai fini dell'eleggibilità | SPINRAZA (nusinersen)_SMA |
| O                                                                              | Campo obbligatorio                           |                           |
| Spinraza è indicato per il trattamento dell'atrofia muscolare spinale (Sma) 5q |                                              |                           |

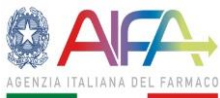

| 1- Scheda Registrazione paziente (RP) |     |               |
|---------------------------------------|-----|---------------|
| E                                     | Età | nessun limite |

| 2- Scheda Eleggibilità e Dati Clinici (EDC)                                                                                                                                                                                                                                                                                                                                 |                                                                                   |                                                                                                                                                 |
|-----------------------------------------------------------------------------------------------------------------------------------------------------------------------------------------------------------------------------------------------------------------------------------------------------------------------------------------------------------------------------|-----------------------------------------------------------------------------------|-------------------------------------------------------------------------------------------------------------------------------------------------|
| Per l'individuazione del presunto fenotipo di SMA si faccia riferimento a:<br>1) Arnold WD, Kassar D, Kissel JT. Spinal muscular atrophy: diagnosis and management in a new therapeutic era. Muscle Nerve. 2015;51(2):157-67.<br>2) Mercuri E, Bertini E, Iannaccone ST. Childhood spinal muscular atrophy: controversies and challenges. Lancet Neurol. 2012;11(5):443-52. |                                                                                   |                                                                                                                                                 |
| E                                                                                                                                                                                                                                                                                                                                                                           | Paziente con diagnosi geneticamente accertata di SMA 5q (mutazioni nel gene SMN1) | Si                                                                                                                                              |
|                                                                                                                                                                                                                                                                                                                                                                             |                                                                                   | No                                                                                                                                              |
| O                                                                                                                                                                                                                                                                                                                                                                           | Disponibilità del numero di copie del gene paralogo SMN2                          | Si                                                                                                                                              |
|                                                                                                                                                                                                                                                                                                                                                                             |                                                                                   | No                                                                                                                                              |
| Se Sì, si apre la seguente domanda                                                                                                                                                                                                                                                                                                                                          |                                                                                   |                                                                                                                                                 |
| O                                                                                                                                                                                                                                                                                                                                                                           | Numero di copie del gene paralogo SMN2                                            | 0                                                                                                                                               |
|                                                                                                                                                                                                                                                                                                                                                                             |                                                                                   | 1                                                                                                                                               |
|                                                                                                                                                                                                                                                                                                                                                                             |                                                                                   | 2                                                                                                                                               |
|                                                                                                                                                                                                                                                                                                                                                                             |                                                                                   | 3                                                                                                                                               |
|                                                                                                                                                                                                                                                                                                                                                                             |                                                                                   | 4                                                                                                                                               |
|                                                                                                                                                                                                                                                                                                                                                                             |                                                                                   | >4                                                                                                                                              |
|                                                                                                                                                                                                                                                                                                                                                                             |                                                                                   | blocca                                                                                                                                          |
| E                                                                                                                                                                                                                                                                                                                                                                           | Presunto fenotipo di SMA                                                          | tipo 0                                                                                                                                          |
|                                                                                                                                                                                                                                                                                                                                                                             |                                                                                   | tipo 1 (esordio prima dei 6 mesi) mai acquisito la posizione seduta                                                                             |
|                                                                                                                                                                                                                                                                                                                                                                             |                                                                                   | tipo 2 (esordio tra 7-18 mesi) ha acquisito la posizione seduta (anche se in passato e potrebbe averla persa)                                   |
|                                                                                                                                                                                                                                                                                                                                                                             |                                                                                   | tipo 3a (esordio tra i 18 mesi e prima del 3° anno di età) ha acquisito la deambulazione autonoma (anche se in passato e potrebbe averla persa) |
|                                                                                                                                                                                                                                                                                                                                                                             |                                                                                   | tipo 3b (esordio dopo il 3° anno di età)                                                                                                        |
|                                                                                                                                                                                                                                                                                                                                                                             |                                                                                   | tipo 4                                                                                                                                          |
|                                                                                                                                                                                                                                                                                                                                                                             |                                                                                   | blocca                                                                                                                                          |

| Caratteristiche della patologia                                               |                                                                       |                                                                                                               |
|-------------------------------------------------------------------------------|-----------------------------------------------------------------------|---------------------------------------------------------------------------------------------------------------|
| O                                                                             | Data esordio della patologia                                          | .././....                                                                                                     |
| O                                                                             | Data della diagnosi                                                   | .././....                                                                                                     |
| O                                                                             | Paziente sintomatico                                                  | Si<br>No                                                                                                      |
| O                                                                             | Età del paziente alla diagnosi                                        | ...                                                                                                           |
| O                                                                             | Paziente in grado di mantenere la posizione seduta?                   | Si                                                                                                            |
|                                                                               |                                                                       | No                                                                                                            |
|                                                                               |                                                                       | Non pertinente                                                                                                |
| O                                                                             | Paziente deambulante?                                                 | Si                                                                                                            |
|                                                                               |                                                                       | No                                                                                                            |
|                                                                               |                                                                       | Non pertinente                                                                                                |
| O                                                                             | Presenza di complicanze respiratorie?                                 | Si                                                                                                            |
|                                                                               |                                                                       | No                                                                                                            |
| Se si risponde Sì, si apre la seguente domanda:                               |                                                                       |                                                                                                               |
| O                                                                             | Paziente in ventilazione assistita?                                   | Si                                                                                                            |
|                                                                               |                                                                       | No                                                                                                            |
| In caso di paziente con diagnosi di Sma tipo 2, si aprono le seguenti domande |                                                                       |                                                                                                               |
| O                                                                             | E' stata eseguita la misurazione della capacità vitale forzata (FVC)? | Si                                                                                                            |
|                                                                               |                                                                       | No                                                                                                            |
| Se si risponde Sì, si apre la seguente domanda:                               |                                                                       |                                                                                                               |
| O                                                                             | FVC                                                                   | ..                                                                                                            |
|                                                                               |                                                                       | %                                                                                                             |
| O                                                                             | Test effettuato:                                                      | CHOP INTEND                                                                                                   |
|                                                                               |                                                                       | Motor milestones HINE, sez. 2                                                                                 |
|                                                                               |                                                                       | HFMSE                                                                                                         |
|                                                                               | Se indicato CHOP si apre la scala CHOP INTEND                         | ...                                                                                                           |
|                                                                               | Scala CHOP-Intend (punteggio variabile da 0 a 4 in ciascun item)      | editabile                                                                                                     |
|                                                                               |                                                                       | Score                                                                                                         |
| O                                                                             | 1                                                                     | Movimento spontaneo (estremità superiore)                                                                     |
|                                                                               | 2                                                                     | Movimento spontaneo (estremità inferiore)                                                                     |
|                                                                               | 3                                                                     | Capacità di impugnare (handgrip)                                                                              |
|                                                                               | 4                                                                     | Capo mantenuto sulla linea mediana con stimolazione visiva                                                    |
|                                                                               | 5                                                                     | Adduzione delle anche                                                                                         |
|                                                                               | 6                                                                     | Rotolamento sollecitato dalle gambe                                                                           |
|                                                                               | 7                                                                     | Rotolamento sollecitato dalle braccia                                                                         |
|                                                                               | 8                                                                     | Flessione spalla e gomito e abduzione orizzontale (in decubito laterale)                                      |
|                                                                               | 9                                                                     | Flessione spalla e flessione gomito (da seduto in grembo o sul tappeto con supporto per testa e tronco)       |
|                                                                               | 10                                                                    | Estensione ginocchio da seduto in braccio (da seduto in grembo o sul tappeto con supporto per testa e tronco) |
|                                                                               | 11                                                                    | Flessione anca, dorsiflessione piede                                                                          |
|                                                                               | 12                                                                    | Controllo del capo da seduto                                                                                  |
|                                                                               | 13                                                                    | Flessione gomito da supino - risposta alla trazione (v. item 14)                                              |
|                                                                               | 14                                                                    | Flessione collo - risposta alla trazione (v. item 13)                                                         |
|                                                                               | 15                                                                    | Estensione capo/collo (Landau)                                                                                |
|                                                                               | 16                                                                    | Inarcamento spinale (Galant)                                                                                  |
|                                                                               | Punteggio Totale:                                                     | .../64                                                                                                        |

|   |                                                                                    |                                                                          |                  |
|---|------------------------------------------------------------------------------------|--------------------------------------------------------------------------|------------------|
|   | Se indicato Motor milestones HINE, sez. 2 si apre la Motor milestones HINE, sez. 2 | ...                                                                      | <i>editabile</i> |
|   | HAMMERSMITH INFANT NEUROLOGICAL EXAMINATION, SECTION 2 (age 2-24 months)           |                                                                          | Score            |
|   | Motor milestone category                                                           | Milestone level progression and age [months] expected in healthy infants |                  |
| O | Voluntary grasp                                                                    | No grasp                                                                 |                  |
|   |                                                                                    | Uses whole hand                                                          |                  |
|   |                                                                                    | Index finger and thumb but immature grasp                                |                  |
|   |                                                                                    | Pincer grasp                                                             |                  |
|   | Ability to kick (in supine position)                                               | No kicking                                                               |                  |
|   |                                                                                    | Kick horizontal, legs do not lift                                        |                  |
|   |                                                                                    | Upward (vertical) [3]                                                    |                  |
|   |                                                                                    | Touches leg [4 to 5]                                                     |                  |
|   | Head control                                                                       | Touches toes [5 to 6]                                                    |                  |
|   |                                                                                    | Unable to maintain upright [< 3]                                         |                  |
|   |                                                                                    | Wobbles [4]                                                              |                  |
|   | Rolling                                                                            | All the time upright [5]                                                 |                  |
|   |                                                                                    | No rolling                                                               |                  |
|   |                                                                                    | Rolling to side [4]                                                      |                  |
|   |                                                                                    | Prone to supine [6]                                                      |                  |
|   | Sitting                                                                            | Supine to prone [7]                                                      |                  |
|   |                                                                                    | Cannot sit                                                               |                  |
|   |                                                                                    | Sit with support at hips [4]                                             |                  |
|   |                                                                                    | Props self using arms [6]                                                |                  |
|   |                                                                                    | Stable sit [7]                                                           |                  |
|   | Crawling                                                                           | Pivots (rotates) [10]                                                    |                  |
|   |                                                                                    | Does not lift head                                                       |                  |
|   |                                                                                    | On elbow [3]                                                             |                  |
|   |                                                                                    | On outstretched hand [4-5]                                               |                  |
|   |                                                                                    | Crawling flat on abdomen [8]                                             |                  |
|   | Standing                                                                           | On hands and feet [10]                                                   |                  |
|   |                                                                                    | Does not support weight                                                  |                  |
|   |                                                                                    | Supports weight [4-5]                                                    |                  |
|   |                                                                                    | Stands with support [8]                                                  |                  |
|   | Walking                                                                            | Stands unaided [12]                                                      |                  |
|   |                                                                                    | No walking                                                               |                  |
|   |                                                                                    | Bouncing [6]                                                             |                  |
|   |                                                                                    | Cruising (holding on) [11]                                               |                  |
|   |                                                                                    | Walking independently [15]                                               |                  |
|   |                                                                                    | Total                                                                    | ../26            |

|   |                                                                                      |     |                         |
|---|--------------------------------------------------------------------------------------|-----|-------------------------|
|   | Se indicato HFMSE si apre la scala HFMSE                                             | ... | <i>editabile</i>        |
|   | HFMSE (0, 1, 2 for each items)                                                       |     |                         |
| O | Test item 1: Plinth /chair sitting                                                   | ... | menù a tendina 0, 1 o 2 |
|   | Test item 1: Additional postural information                                         | ... |                         |
|   | Test item 2: Long sitting                                                            | ... |                         |
|   | Test item 3: One hand to head in sitting                                             | ... |                         |
|   | Test item 4: Two hands to head in sitting                                            | ... |                         |
|   | Test item 5: Supine to side lying                                                    | ... |                         |
|   | Test item 6: Rolls prone to supine over R                                            | ... |                         |
|   | Test item 7: Rolls prone to supine over L                                            | ... |                         |
|   | Test item 8: Rolls supine to prone over R                                            | ... |                         |
|   | Test item 9: Rolls supine to prone over L                                            | ... |                         |
|   | Test item 10: Sitting to lying                                                       | ... |                         |
|   | Test item 11: Props on forearms                                                      | ... |                         |
|   | Test item 12: Lifts head from prone                                                  | ... |                         |
|   | Test item 13: Prop on extended arms                                                  | ... |                         |
|   | Test item 14: Lying to sitting                                                       | ... |                         |
|   | Test item 15: Four-point kneeling                                                    | ... |                         |
|   | Test item 16: Crawling                                                               | ... |                         |
|   | Test item 17: Lifts head from supine                                                 | ... |                         |
|   | Test item 18: Supported standing                                                     | ... |                         |
|   | Test item 19: Stand unsupported                                                      | ... |                         |
|   | Test item 20: Stepping                                                               | ... |                         |
|   | Item 21: Right hip flexion in supine                                                 | ... |                         |
|   | Item 22: Left hip flexion in supine                                                  | ... |                         |
|   | Item 23: High kneeling to right half kneel                                           | ... |                         |
|   | Item 24: High kneeling to left half kneel                                            | ... |                         |
|   | Item 25: High kneeling to standing, leading with left leg (through right half kneel) | ... |                         |
|   | Item 26: High kneeling to standing leading with right leg (through left half kneel)  | ... |                         |
|   | Item 27: Stand to sitting on the floor                                               | ... |                         |
|   | Item 28: Squat                                                                       | ... |                         |
|   | Item 29: Jumps 12 inches forward                                                     | ... |                         |
|   | Item 30: Ascends 4 stairs with railing                                               | ... |                         |
|   | Item 31: Descends 4 stairs with railing                                              | ... |                         |
|   | Item 32: Ascends 4 stairs without arm support                                        | ... |                         |
|   | Item 33: Descends 4 stairs without arm support                                       | ... |                         |
|   | Total score                                                                          |     | .../66                  |

|                                                                                   |                                                                                                                        |           |                  |
|-----------------------------------------------------------------------------------|------------------------------------------------------------------------------------------------------------------------|-----------|------------------|
| Solo nel caso di <i>Presunto fenotipo di SMA tipo 1</i> si apre la domanda sotto: |                                                                                                                        |           |                  |
| E                                                                                 | Paziente già sottoposto ad altri trattamenti farmacologici specifici per la SMA                                        | Si        | blocca           |
|                                                                                   |                                                                                                                        | No        |                  |
|                                                                                   |                                                                                                                        |           |                  |
| O                                                                                 | Paziente già in trattamento con nusinersen secondo l'indicazione autorizzata EMA e i criteri AIFA (DM 08 maggio 2003)? | Si        |                  |
|                                                                                   |                                                                                                                        | No        |                  |
| Se Sì, si aprono le due seguenti domande                                          |                                                                                                                        |           |                  |
| O                                                                                 | Data inizio trattamento con nusinersen                                                                                 | .././.... | giorno/mese/anno |
| O                                                                                 | Numero di somministrazioni effettuate                                                                                  | ..        |                  |
|                                                                                   |                                                                                                                        |           |                  |

|                                                                                                                                                                                                                                                                                                                                                                                           |  |             |
|-------------------------------------------------------------------------------------------------------------------------------------------------------------------------------------------------------------------------------------------------------------------------------------------------------------------------------------------------------------------------------------------|--|-------------|
| 3- Scheda Richiesta Farmaco (RF)                                                                                                                                                                                                                                                                                                                                                          |  |             |
| <i>Il trattamento con Spinraza deve essere iniziato esclusivamente da un medico esperto nella gestione dell'atrofia muscolare spinale (SMA).<br/>La decisione di procedere con il trattamento deve basarsi su una esperta valutazione personalizzata sul singolo soggetto dei benefici attesi dal trattamento con Spinraza rispetto al suo potenziale rischio (vd paragrafo 4.2 RCP).</i> |  | testo fisso |
| <i>Il trattamento con Spinraza deve essere iniziato non appena possibile dopo la diagnosi, con 4 dosi di carico ai Giorni 0, 14, 28 e 63. Successivamente, una dose di mantenimento deve essere somministrata una volta ogni 4 mesi.</i>                                                                                                                                                  |  |             |
| <i>Si prega di leggere attentamente il Riassunto delle Caratteristiche del Prodotto di SPINRAZA prima del suo utilizzo.</i>                                                                                                                                                                                                                                                               |  |             |
| <i>La durata delle RF1 e RF2 è di 14 giorni. La durata di RF3 è di 35 giorni. La durata delle successive RF è di 120 giorni.</i>                                                                                                                                                                                                                                                          |  |             |

|                       |                                                  |                      |                                                |
|-----------------------|--------------------------------------------------|----------------------|------------------------------------------------|
| <input type="radio"/> | Data richiesta farmaco                           | .././....            |                                                |
| <input type="radio"/> | Richiesta numero                                 | 1                    | il numero delle dosi è precompilato            |
| <input type="radio"/> | Tipo di dose                                     | dose di carico       | max 4 RF. Compilata in automatico da RF1 a RF4 |
|                       |                                                  | dose di mantenimento | Compilata in automatico da RF5 in poi          |
| <input type="radio"/> | Posologia richiesta                              | 12 mg (5 ml)         |                                                |
| <input type="radio"/> | Dose/Die o Dose calcolata in base alla posologia |                      | uguale a posologia richiesta                   |
| <input type="radio"/> | Dose totale (mg)                                 | ...                  | calcolo in automatico                          |

|                                                    |                                                                              |    |           |
|----------------------------------------------------|------------------------------------------------------------------------------|----|-----------|
| Dalla RF2 in poi si aprono le domande sottostanti: |                                                                              |    |           |
| <input type="radio"/>                              | Ci sono state reazioni avverse al medicinale nel ciclo precedente?           | Si | link RNFV |
|                                                    |                                                                              | No |           |
| <input type="radio"/>                              | Sono state verificate le condizioni riportate al paragrafo 4.3 e 4.4 di RCP? | Si | blocca    |
|                                                    |                                                                              | No |           |

|                                      |                                                                                              |                      |                                           |
|--------------------------------------|----------------------------------------------------------------------------------------------|----------------------|-------------------------------------------|
| 4- Scheda Dispensazione Farmaco (DF) |                                                                                              |                      |                                           |
|                                      | Lista AIC                                                                                    | Numero di confezioni |                                           |
| <input type="radio"/>                | 045426018: flaconcino da 5 ml contenente nusinersen sodico equivalente a 12 mg di nusinersen | 1                    | il numero delle confezioni è precompilato |

5- Scheda Rivalutazione (RIV)

RV1 obbligatoria dopo la fine delle dosi di carico. RIV successive obbligatorie dopo ogni RF (4 mesi)

|   |                                                                                          |                                                                                                                  |                                                                                                                                                                                                                                                                              |
|---|------------------------------------------------------------------------------------------|------------------------------------------------------------------------------------------------------------------|------------------------------------------------------------------------------------------------------------------------------------------------------------------------------------------------------------------------------------------------------------------------------|
| O | Data di RV                                                                               | .././....                                                                                                        |                                                                                                                                                                                                                                                                              |
| O | Stato di malattia (secondo il giudizio del clinico)                                      | migliorato                                                                                                       |                                                                                                                                                                                                                                                                              |
|   |                                                                                          | peggiorato                                                                                                       |                                                                                                                                                                                                                                                                              |
|   |                                                                                          | stabile                                                                                                          |                                                                                                                                                                                                                                                                              |
| O | Test effettuato:                                                                         | CHOP INTEND                                                                                                      | in RIV1 Il sistema ripropone il test selezionato in EDC riportando i campi precompilati ma editabili. Da RIV2 in poi il sistema ripropone il test selezionato nel RIV precedente riportando i campi precompilati ma editabili. E' selezionabile comunque anche un altro test |
|   |                                                                                          | Motor milestones HINE, sez. 2                                                                                    |                                                                                                                                                                                                                                                                              |
|   |                                                                                          | HFMSE                                                                                                            |                                                                                                                                                                                                                                                                              |
|   | Se indicato CHOP INTEND si apre la scala CHOP INTEND                                     | ...                                                                                                              |                                                                                                                                                                                                                                                                              |
|   | Scala CHOP-Intend (punteggio variabile da 0 a 4 in ciascun item)                         |                                                                                                                  | Score                                                                                                                                                                                                                                                                        |
|   |                                                                                          | 1 Movimento spontaneo (estremità superiore)                                                                      |                                                                                                                                                                                                                                                                              |
|   |                                                                                          | 2 Movimento spontaneo (estremità inferiore)                                                                      |                                                                                                                                                                                                                                                                              |
|   |                                                                                          | 3 Capacità di impugnare (handgrip)                                                                               |                                                                                                                                                                                                                                                                              |
|   |                                                                                          | 4 Capo mantenuto sulla linea mediana con stimolazione visiva                                                     |                                                                                                                                                                                                                                                                              |
|   |                                                                                          | 5 Adduzione delle anche                                                                                          |                                                                                                                                                                                                                                                                              |
|   |                                                                                          | 6 Rotolamento sollecitato dalle gambe                                                                            |                                                                                                                                                                                                                                                                              |
|   |                                                                                          | 7 Rotolamento sollecitato dalle braccia                                                                          |                                                                                                                                                                                                                                                                              |
|   |                                                                                          | 8 Flessione spalla e gomito e abduzione orizzontale (in decubito laterale)                                       |                                                                                                                                                                                                                                                                              |
|   |                                                                                          | 9 Flessione spalla e flessione gomito (da seduto in grembo o sul tappeto con supporto per testa e tronco)        |                                                                                                                                                                                                                                                                              |
|   |                                                                                          | 10 Estensione ginocchio da seduto in braccio (da seduto in grembo o sul tappeto con supporto per testa e tronco) |                                                                                                                                                                                                                                                                              |
|   |                                                                                          | 11 Flessione anca, dorsiflessione piede                                                                          |                                                                                                                                                                                                                                                                              |
|   |                                                                                          | 12 Controllo del capo da seduto                                                                                  |                                                                                                                                                                                                                                                                              |
|   |                                                                                          | 13 Flessione gomito da supino - risposta alla trazione (v. item 14)                                              |                                                                                                                                                                                                                                                                              |
|   |                                                                                          | 14 Flessione collo - risposta alla trazione (v. item 13)                                                         |                                                                                                                                                                                                                                                                              |
|   |                                                                                          | 15 Estensione capo/collo (Landau)                                                                                |                                                                                                                                                                                                                                                                              |
|   |                                                                                          | 16 Inarcamento spinale (Galant)                                                                                  |                                                                                                                                                                                                                                                                              |
|   |                                                                                          | Punteggio Totale:                                                                                                | .../64                                                                                                                                                                                                                                                                       |
|   |                                                                                          |                                                                                                                  |                                                                                                                                                                                                                                                                              |
|   | Se indicato Motor milestones HINE, sez. 2 si apre la scala Motor milestones HINE, sez. 2 | ...                                                                                                              |                                                                                                                                                                                                                                                                              |

|   |                                                                          |                                                                          |
|---|--------------------------------------------------------------------------|--------------------------------------------------------------------------|
|   | HAMMERSMITH INFANT NEUROLOGICAL EXAMINATION, SECTION 2 (age 2-24 months) |                                                                          |
| O | Motor milestone category                                                 | Milestone level progression and age [months] expected in healthy infants |
|   | Voluntary grasp                                                          | No grasp                                                                 |
|   |                                                                          | Uses whole hand                                                          |
|   |                                                                          | Index finger and thumb but immature grasp                                |
|   |                                                                          | Pincer grasp                                                             |
|   | Ability to kick (in supine position)                                     | No kicking                                                               |
|   |                                                                          | Kick horizontal, legs do not lift                                        |
|   |                                                                          | Upward (vertical) [3]                                                    |
|   |                                                                          | Touches leg [4 to 5]                                                     |
|   |                                                                          | Touches toes [5 to 6]                                                    |
|   | Head control                                                             | Unable to maintain upright [< 3]                                         |
|   |                                                                          | Wobbles [4]                                                              |
|   |                                                                          | All the time upright [5]                                                 |
|   | Rolling                                                                  | No rolling                                                               |
|   |                                                                          | Rolling to side [4]                                                      |
|   |                                                                          | Prone to supine [6]                                                      |
|   |                                                                          | Supine to prone [7]                                                      |
|   | Sitting                                                                  | Cannot sit                                                               |
|   |                                                                          | Sit with support at hips [4]                                             |
|   |                                                                          | Props self using arms [6]                                                |
|   |                                                                          | Stable sit [7]                                                           |
|   |                                                                          | Pivots (rotates) [10]                                                    |
|   | Crawling                                                                 | Does not lift head                                                       |
|   |                                                                          | On elbow [3]                                                             |
|   |                                                                          | On outstretched hand [4-5]                                               |
|   |                                                                          | Crawling flat on abdomen [8]                                             |
|   |                                                                          | On hands and feet [10]                                                   |
|   | Standing                                                                 | Does not support weight                                                  |
|   |                                                                          | Supports weight [4-5]                                                    |
|   |                                                                          | Stands with support [8]                                                  |
|   |                                                                          | Stands unaided [12]                                                      |
|   | Walking                                                                  | No walking                                                               |
|   |                                                                          | Bouncing [6]                                                             |
|   |                                                                          | Cruising (holding on) [11]                                               |
|   |                                                                          | Walking independently [15]                                               |
|   |                                                                          | Total                                                                    |

|   |                                                                                      |                    |                             |
|---|--------------------------------------------------------------------------------------|--------------------|-----------------------------|
|   | Se indicato HFMSE si apre la scala HFMSE                                             | ...                |                             |
|   | HFMSE (0, 1, 2 for each items)                                                       |                    |                             |
|   | Test item 1: Plinth /chair sitting                                                   | ...                | menù a tendina 0, 1 o 2     |
|   | Test item 1: Additional postural information                                         | ...                |                             |
|   | Test item 2: Long sitting                                                            | ...                |                             |
|   | Test item 3: One hand to head in sitting                                             | ...                |                             |
|   | Test item 4: Two hands to head in sitting                                            | ...                |                             |
|   | Test item 5: Supine to side lying                                                    | ...                |                             |
|   | Test item 6: Rolls prone to supine over R                                            | ...                |                             |
|   | Test item 7: Rolls prone to supine over L                                            | ...                |                             |
|   | Test item 8: Rolls supine to prone over R                                            | ...                |                             |
|   | Test item 9: Rolls supine to prone over L                                            | ...                |                             |
|   | Test item 10: Sitting to lying                                                       | ...                |                             |
|   | Test item 11: Props on forearms                                                      | ...                |                             |
|   | Test item 12: Lifts head from prone                                                  | ...                |                             |
|   | Test item 13: Prop on extended arms                                                  | ...                |                             |
|   | Test item 14: Lying to sitting                                                       | ...                |                             |
|   | Test item 15: Four-point kneeling                                                    | ...                |                             |
|   | Test item 16: Crawling                                                               | ...                |                             |
|   | Test item 17: Lifts head from supine                                                 | ...                |                             |
|   | Test item 18: Supported standing                                                     | ...                |                             |
|   | Test item 19: Stand unsupported                                                      | ...                |                             |
|   | Test item 20: Stepping                                                               | ...                |                             |
|   | Item 21: Right hip flexion in supine                                                 | ...                |                             |
|   | Item 22: Left hip flexion in supine                                                  | ...                |                             |
|   | Item 23: High kneeling to right half kneel                                           | ...                |                             |
|   | Item 24: High kneeling to left half kneel                                            | ...                |                             |
|   | Item 25: High kneeling to standing, leading with left leg (through right half kneel) | ...                |                             |
|   | Item 26: High kneeling to standing leading with right leg (through left half kneel)  | ...                |                             |
|   | Item 27: Stand to sitting on the floor                                               | ...                |                             |
|   | Item 28: Squat                                                                       | ...                |                             |
|   | Item 29: Jumps 12 inches forward                                                     | ...                |                             |
|   | Item 30: Ascends 4 stairs with railing                                               | ...                |                             |
|   | Item 31: Descends 4 stairs with railing                                              | ...                |                             |
|   | Item 32: Ascends 4 stairs without arm support                                        | ...                |                             |
|   | Item 33: Descends 4 stairs without arm support                                       | ...                |                             |
|   |                                                                                      | <b>Total score</b> | <b>../66</b>                |
|   |                                                                                      |                    |                             |
| O | n° RF inserite prima di questa RIV                                                   | ..                 | <i>dato in automatico</i>   |
| E | Il paziente continua il trattamento                                                  | Si                 |                             |
|   |                                                                                      | No                 | <i>blocca e inserire FT</i> |

| 6- Scheda Fine Trattamento (FT) |                                                                                          |                                                           |
|---------------------------------|------------------------------------------------------------------------------------------|-----------------------------------------------------------|
| O                               | Data di FT                                                                               | ../../....                                                |
| O                               | Causa di Fine Trattamento                                                                | Decisione del genitore/caregiver/paziente                 |
|                                 |                                                                                          | Passaggio ad altra terapia                                |
|                                 |                                                                                          | Progressione di malattia                                  |
|                                 |                                                                                          | Decisione medica                                          |
|                                 |                                                                                          | Perso al follow up                                        |
|                                 |                                                                                          | Evento avverso grave                                      |
|                                 |                                                                                          | Complicanze legate alla procedura di somministrazione     |
|                                 |                                                                                          | Impossibilità a eseguire la procedura di somministrazione |
|                                 |                                                                                          | Decesso                                                   |
| O                               | Se Decesso, indicare il motivo:                                                          | Progressione di malattia                                  |
|                                 |                                                                                          | Tossicità                                                 |
|                                 |                                                                                          | Altro                                                     |
| O                               | Se Decesso, indicare la data del decesso:                                                | ../../....                                                |
| O                               | Stato di malattia (sulla base dei test effettuati e/o secondo il giudizio del clinico)   | migliorato                                                |
|                                 |                                                                                          | peggiorato                                                |
|                                 |                                                                                          | stabile                                                   |
| O                               | Test effettuato:                                                                         | CHOP INTEND                                               |
|                                 |                                                                                          | Motor milestones HINE, sez. 2                             |
|                                 |                                                                                          | HFMSE                                                     |
|                                 | Se indicato CHOP INTEND si apre la scala CHOP INTEND                                     | ...                                                       |
|                                 | Se indicato Motor milestones HINE, sez. 2 si apre la scala Motor milestones HINE, sez. 2 | ...                                                       |
|                                 | Se indicato HFMSE si apre la scala HFMSE                                                 | ...                                                       |
| O                               | Ci sono state reazioni avverse al medicinale?                                            | Sì                                                        |
|                                 |                                                                                          | No                                                        |
|                                 |                                                                                          |                                                           |

il sistema ripropone il test selezionato nell'ultima RIV riportando i campi precompilati ma editabili. Se non presente alcuna RIV, il sistema ripropone il test selezionato nella EDC riportando i campi precompilati ma editabili.  
E' selezionabile comunque anche un altro test

Link RNFV

7- Scheda follow up (RIV post FT)

Rivalutazione a 1 mese dopo la fine trattamento

|                       |                                                                                          |                               |                    |
|-----------------------|------------------------------------------------------------------------------------------|-------------------------------|--------------------|
| <input type="radio"/> | Data di RV                                                                               | .././....                     |                    |
| <input type="radio"/> | Stato di malattia (secondo il giudizio clinico)                                          | migliorato                    |                    |
|                       |                                                                                          | peggiorato                    |                    |
|                       |                                                                                          | stabile                       |                    |
| <input type="radio"/> | Test effettuato:                                                                         | CHOP INTEND                   |                    |
|                       |                                                                                          | Motor milestones HINE, sez. 2 |                    |
|                       |                                                                                          | HFMSE                         |                    |
|                       | Se indicato CHOP INTEND si apre la scala CHOP INTEND                                     | ...                           |                    |
|                       | Se indicato Motor milestones HINE, sez. 2 si apre la scala Motor milestones HINE, sez. 2 | ...                           |                    |
|                       | Se indicato HFMSE si apre la scala HFMSE                                                 | ...                           |                    |
| <input type="radio"/> | n° RF inserite prima di questa RIV                                                       | ..                            | dato in automatico |
